# Supplementary material
Source: Research Square preprint supplement (doi:10.21203/rs.3.rs-9230836/v1)
Supplement: Supplementary file 1 [file 722303304e4048d40e33aaae.docx]

*Table 2.* Summary of the main findings for each case study (maps adapted from [31, 32]).

| **Case study** | **Map visualization** | **Plastic volumes** |
| --- | --- | --- |
| El Astillero, Nicaragua | 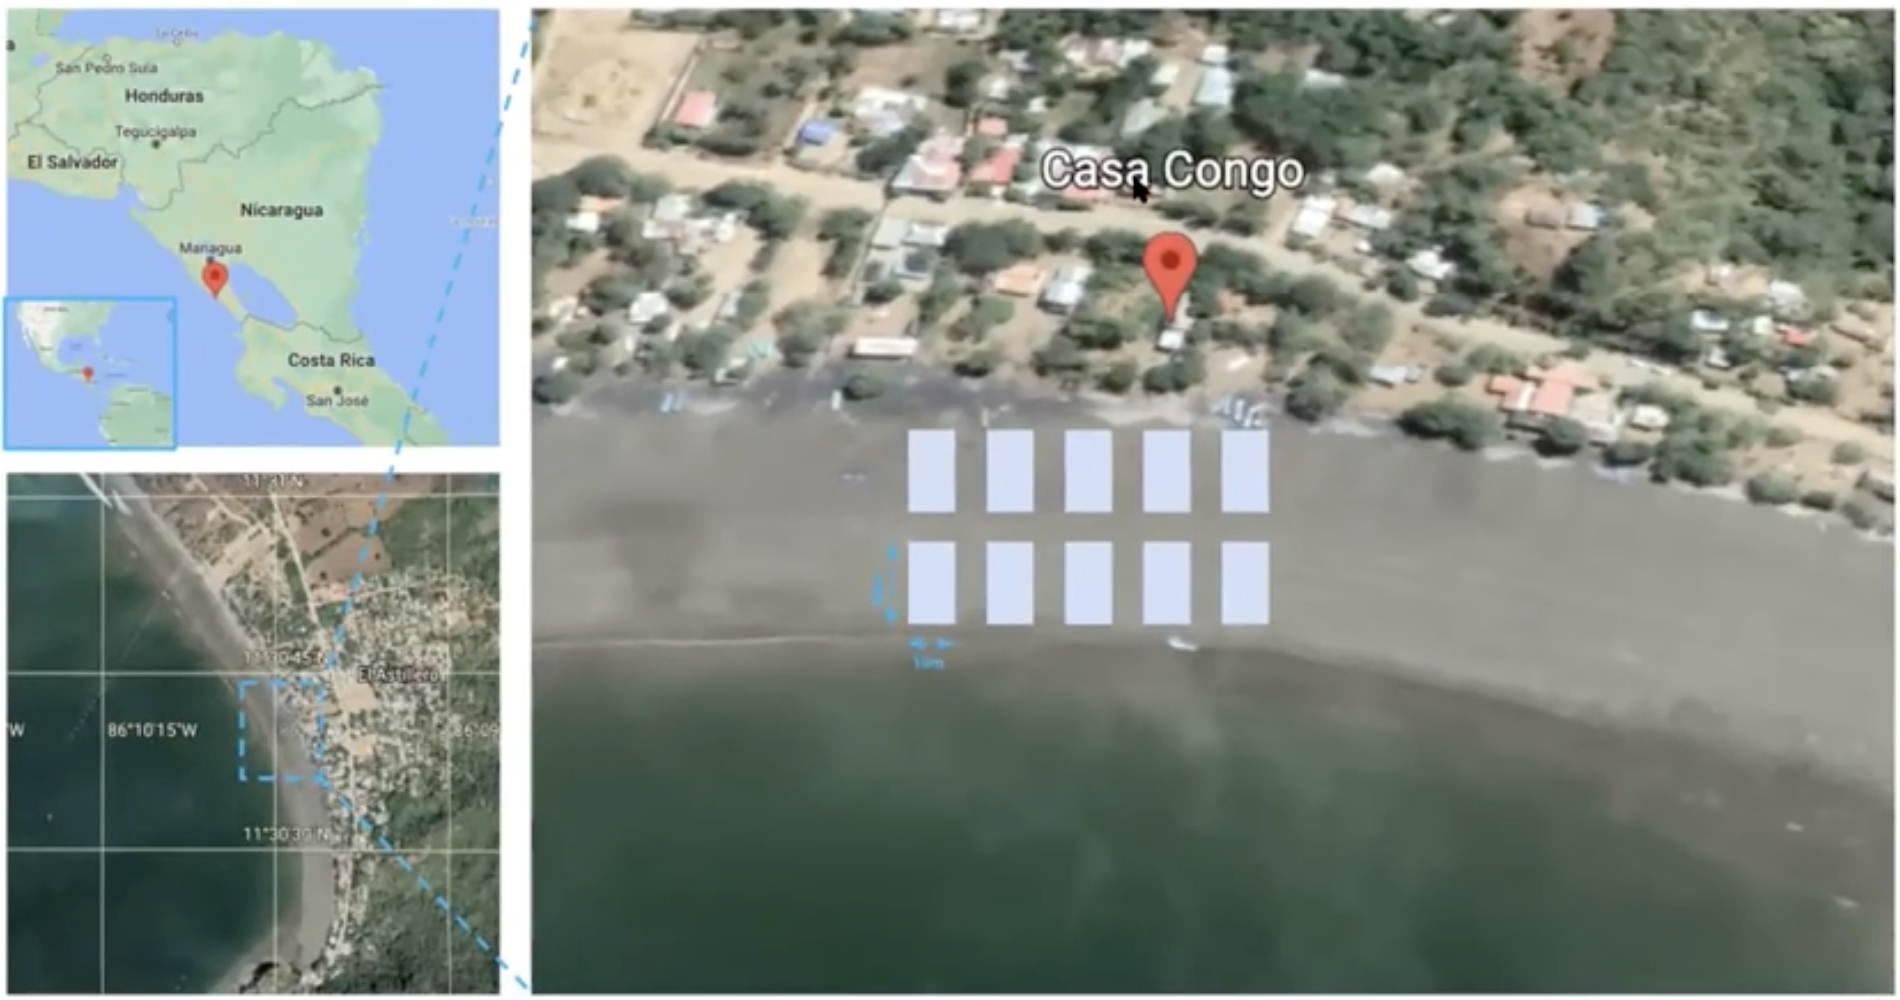 | - 30 kg  - most common items: bottles, shopping bags, tableware, cups, fishing gear, flip flops, tyres, containers.  - origin: 70% land-based, 30% sea-based.  - sectors: housing, packaging, food, tourism, fishing, transportation. |
| Playa Surfista, Venezuela | 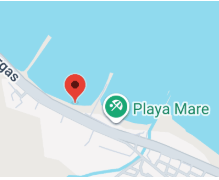 | - 2.4 kg.  - most common items: wrappers, containers, bottles, shopping bags.  - origin: 100% land-based.  - sectors: packaging, food, tourism. |

*Table 3.* Summary of the main findings for each case study.

| **Case study** | **Map visualization** | **Plastic volumes** |
| --- | --- | --- |
| Dunga Beach, Kenya | 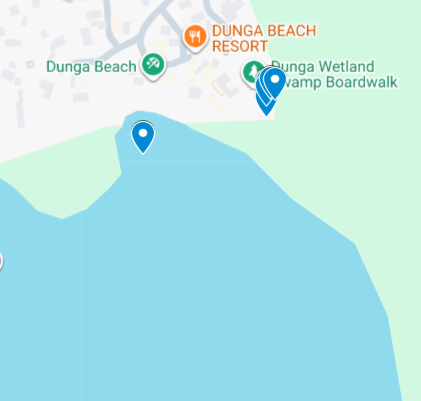 | - 20 kg.  - most common items: bottles, wrappers, fishing lines.  - origin: 95% land-based, 5% sea-based.  - sectors: packaging, food, tourism. |

*Table 4.* Summary of the main findings for each case study (maps adapted from [32-34]).

| **Case study** | **Map visualization** | **Plastic volumes** |
| --- | --- | --- |
| Cosenza, Italy | 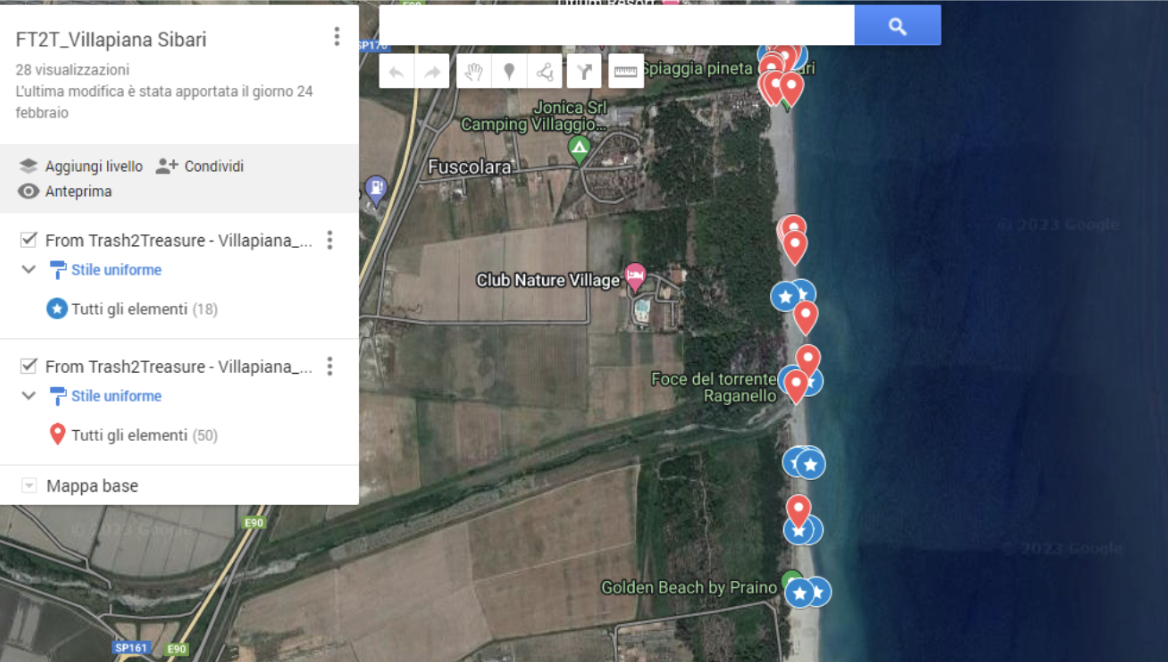 | - 12.86 kg.  - most common items: cigarette butts, wrappers, containers, bottles.  - origin: 100% land-based.  - sectors: packaging, food, tourism. |
| Nicotera Marina, Italy | 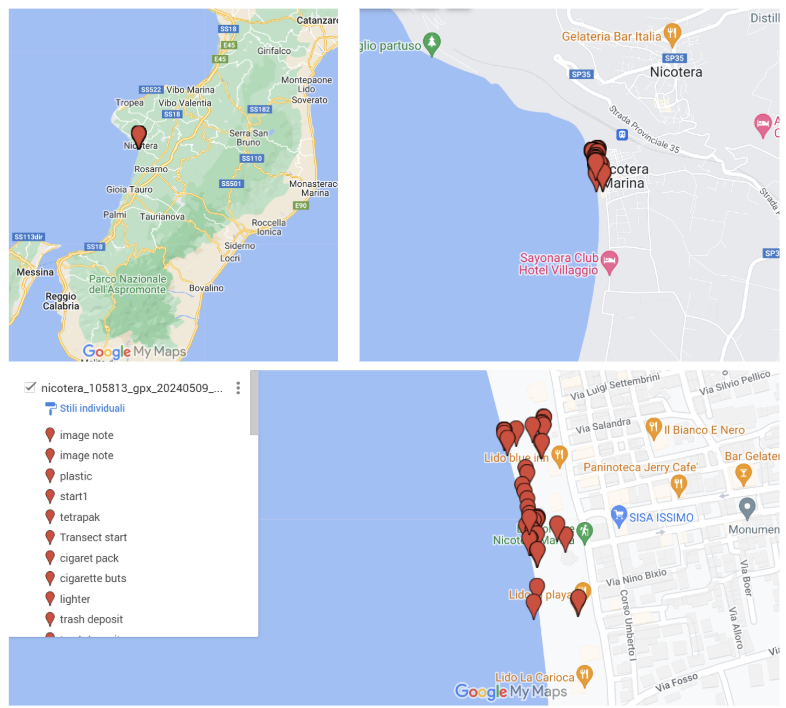 | - 20 kg.  - most common items: cigarette butts, wrappers, containers, bottles.  - origin: 100% land-based.  - sectors: packaging, food, tourism. |
| Catania, Italy | 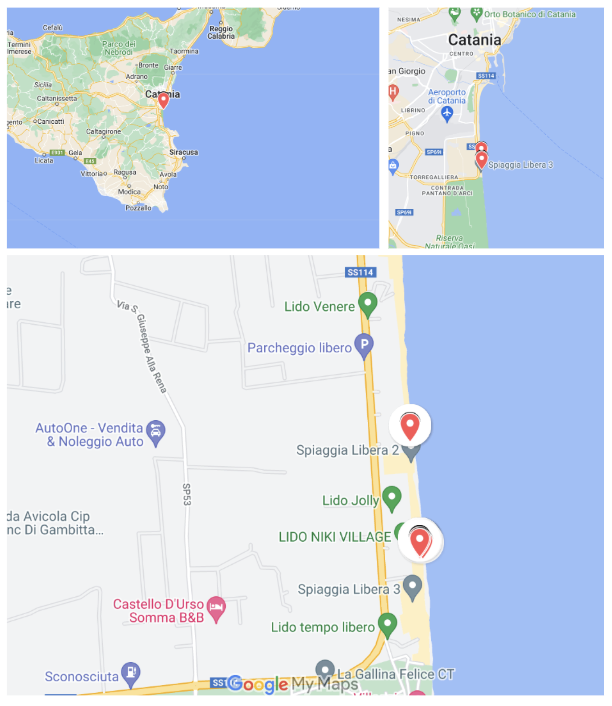 | - 15 kg.  - most common items: cigarette butts, containers, flip flops, wrappers.  - origin: 100% land-based.  - sectors: housing, packaging, tourism. |
| La Marsa, Tunisia | 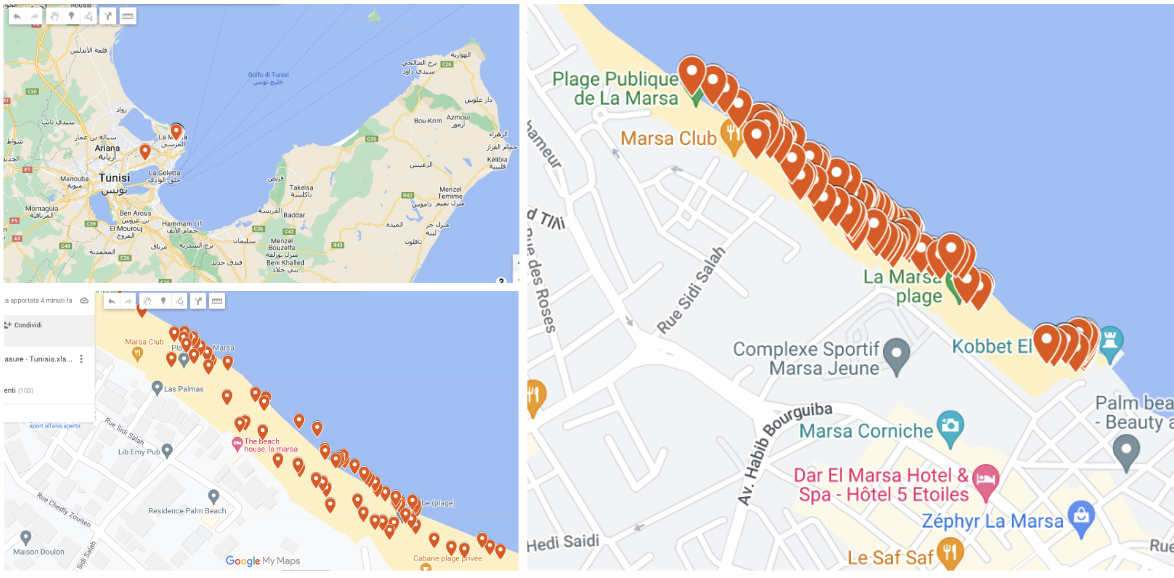 | - 27.6 kg.  - most common items: cigarette butts, wrappers, plates, tyres.  - origin: 100% land-based.  - sectors: housing, packaging, tourism, transportation. |
| Kavouri Beach, Greece | 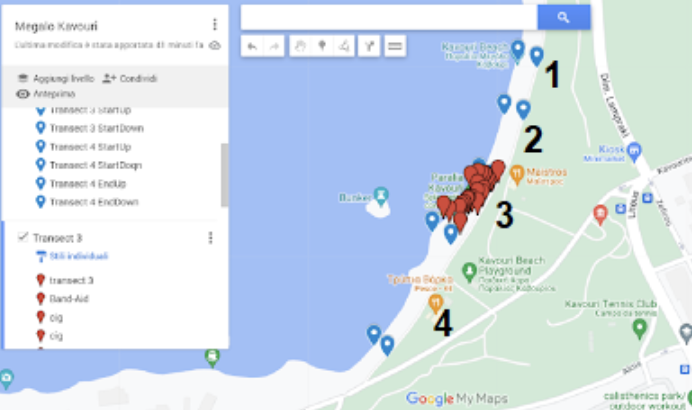 | - 30 kg.  - most common items: caps/lids, sheeting, latex gloves, bottles, containers, cigarette butts, straws.  - origin: 100% land-based.  - sectors: housing, packaging, food, industrial, tourism. |

*Table 5.* Summary of the main findings for each case study (maps adapted from [35-36]).

| **Case study** | **Map visualization** | **Plastic volumes** |
| --- | --- | --- |
| Imperial Beach, U.S. | 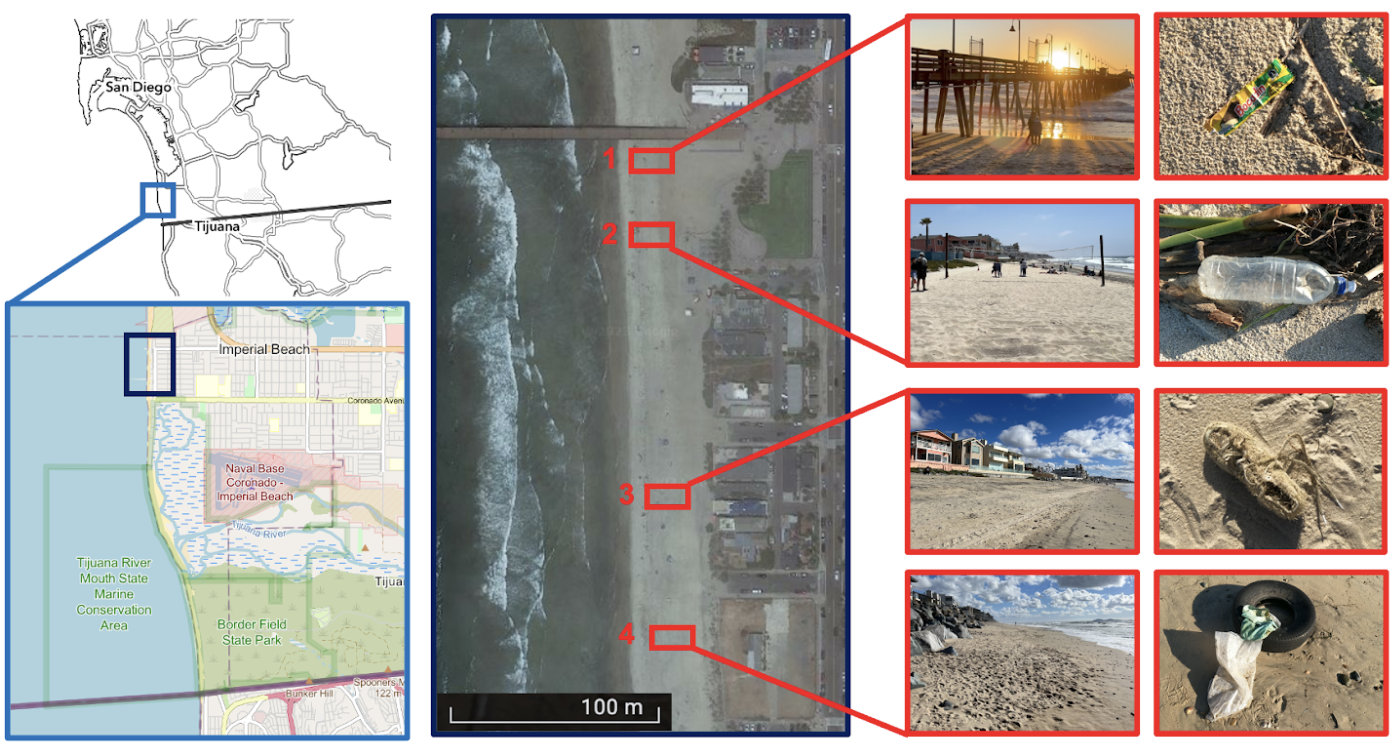 | - 18.6 kg.  - most common items: shopping bags, bottles, caps/lids, wrappers, straws, styrofoam containers.  - origin: 100% land-based.  - sectors: packaging, food, tourism. |
| Tijuana River Estuary, U.S. | 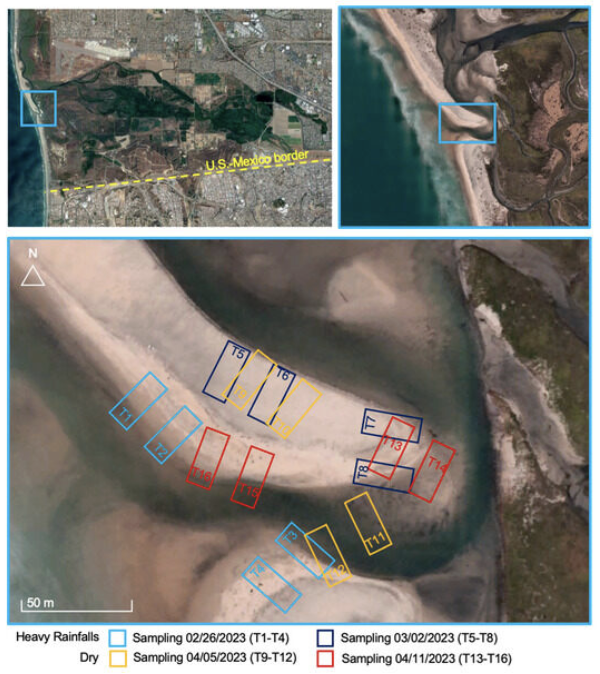 | - 104.5 kg.  - most common items: caps/lids, polystyrene pieces, fishing lines, tubes, wrappers.  - origin: 86% land-based, 14% sea-based.  - sectors: packaging, food, construction, fishing, tourism. |
| U.S.-Mexico International Border | 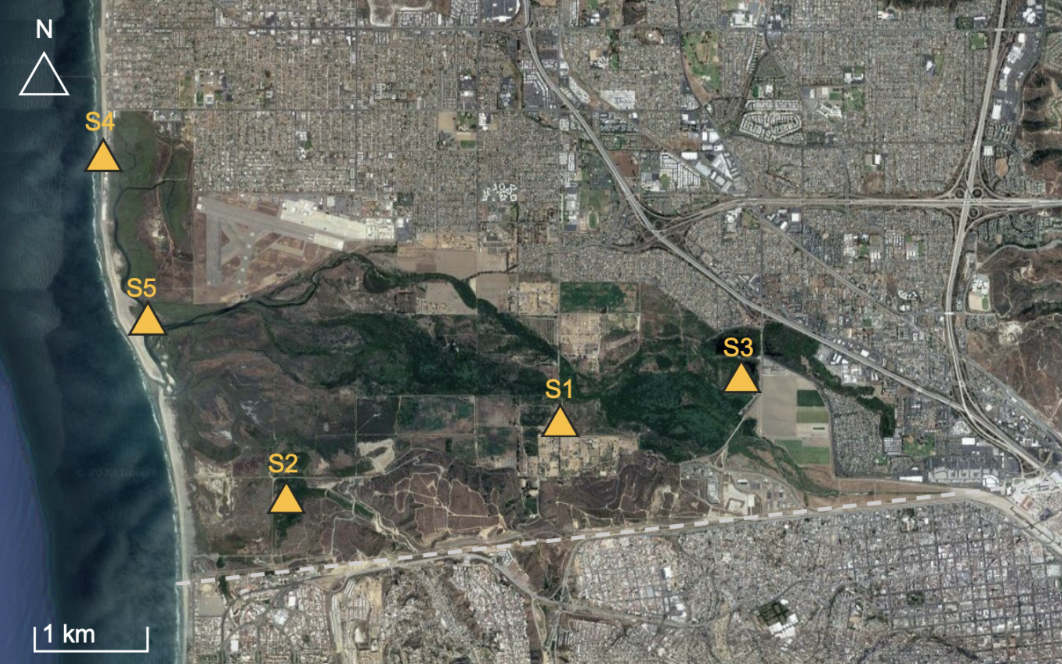 | - 300 metric tons (estimate).  - most common items: shopping bags, bottles, fishing lines, wrappers, polystyrene pieces, containers.  - origin: 60% land-based, 40% sea-based.  - sectors: packaging, tourism, food, transport, housing. |
